# Supplementary material for: mRNA translation is a therapeutic vulnerability necessary for bladder epithelial transformation
Source: PubMed Central journal article supplement (PMC8262354; doi:10.1172/jci.insight.144920), 2021-06-08

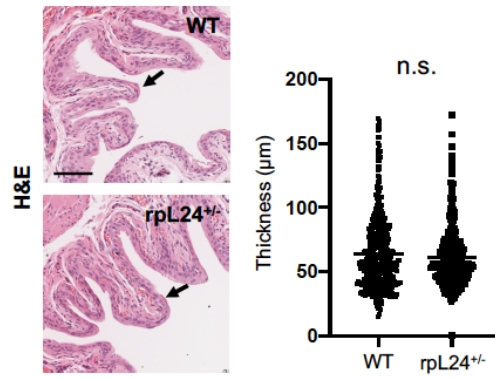

**Figure S1. rpL24<sup>+/-</sup> bladders are histologically normal.** Representative H&E staining of WT and rpL24<sup>+/-</sup> bladder urothelium (scale bar: 100 µm) with quantification (right panel, n = 3 mice/genotype, n.s. = not statistically significant).

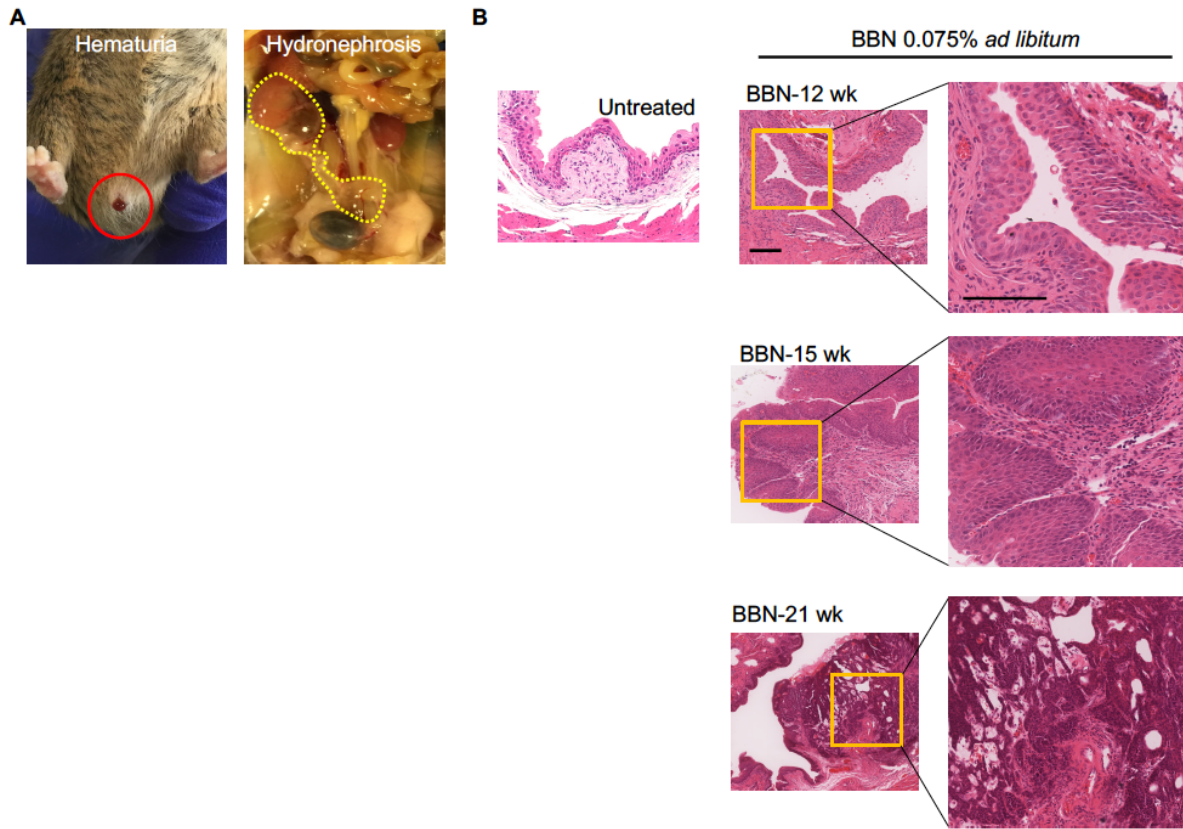

**Figure S2. Gross and microscopic effects of BBN treatment in WT mice. (A)** Representative gross images of mice treated with BBN of over 21 weeks that develop hematuria (demarcated by a red circle) and hydronephrosis (demarcated by a dotted yellow line). **(B)** H&E staining showing development of BBN-induced invasive bladder cancer in WT C57BL/6 mice (representative areas are shown at high magnification for clarity). All scale bars: 100  $\mu$ m.

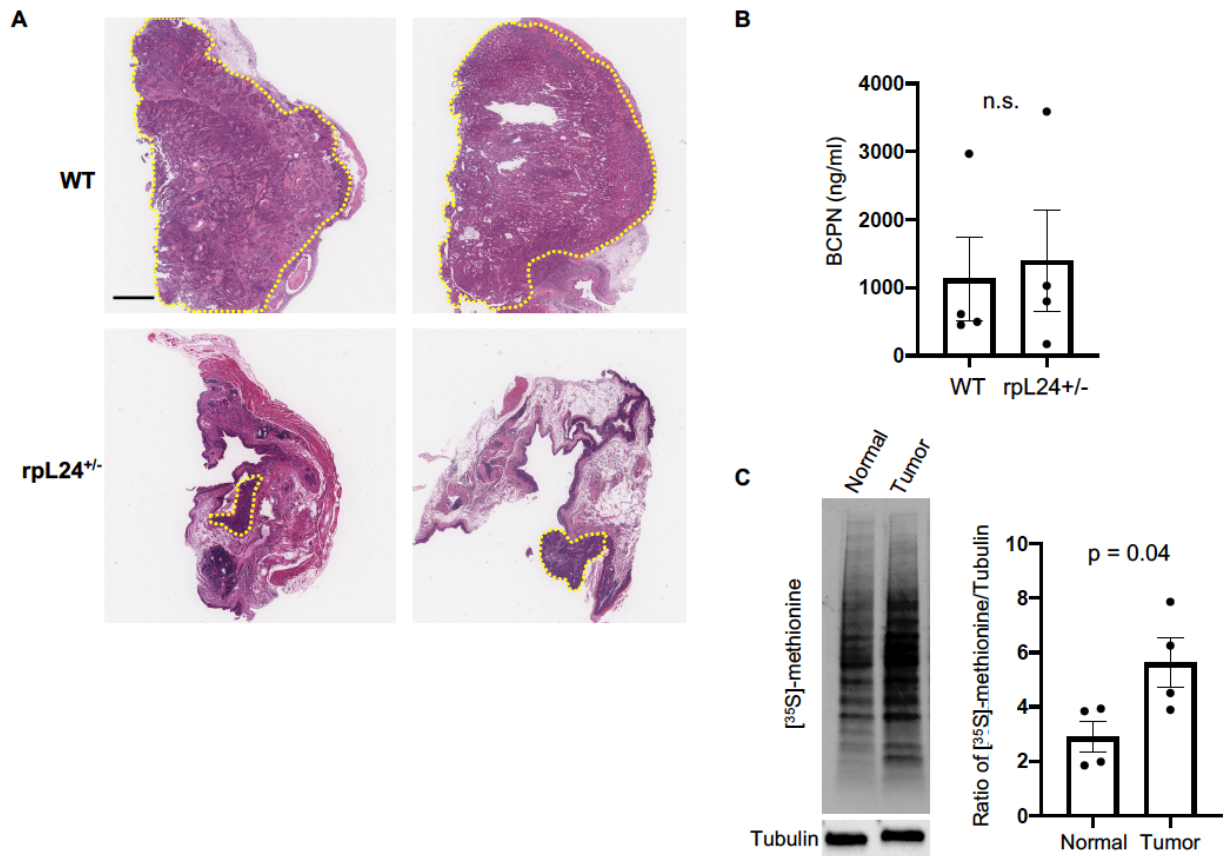

**Figure S3. rpL24<sup>+/-</sup> mice exhibit smaller bladder tumors compared to WT mice but concentrate the carcinogen BCPN in urine at levels similar to WT mice and [<sup>35</sup>S]-methionine incorporation in WT and BBN-induced tumor organoids. (A)** Representative H&E staining showing tumor area of BBN-induced invasive bladder cancer in age-matched WT and rpL24<sup>+/-</sup> mice (all mice depicted were treated with BBN for 200 days, dotted yellow lines demarcate the bladder tumor, scale bar: 1 mm). **(B)** Bar graph representing mass spectrometry data of BCPN, the carcinogenic BBN metabolite, within the urine of WT and rpL24<sup>+/-</sup> mice (n = 4 mice/genotype). n.s. = not statistically significant. Data are presented as means +/- SEM. **(C)** [<sup>35</sup>S]-methionine incorporation in WT and BBN-induced tumor organoids. *Left panel:* representative western blot. *Right panel:* quantification of n = 4 biological replicates (p = 0.04 , t-test). Data are presented as means +/- SEM.

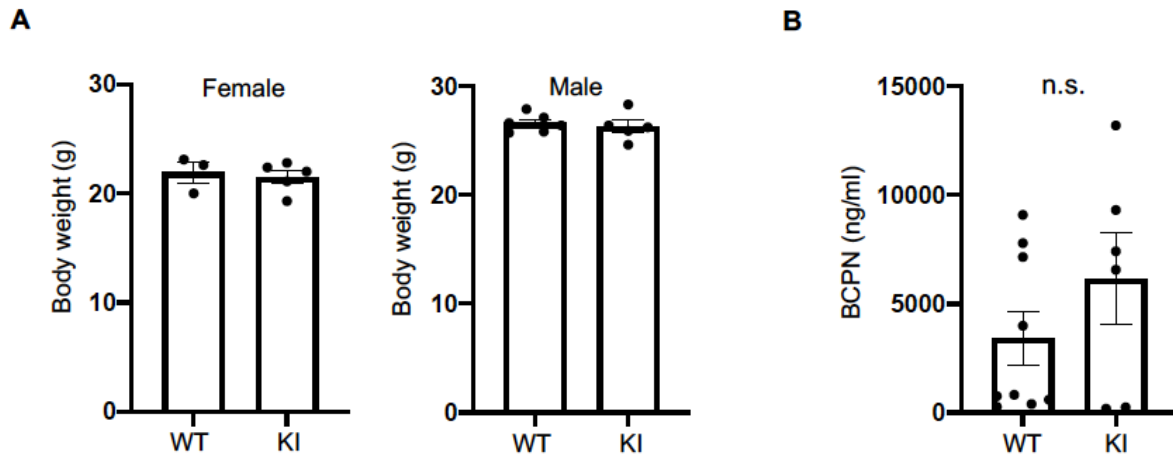

**Figure S4. *eIF4E*<sup>S209A/S209A</sup> mouse weights and urine BCPN levels. (A)** Body weight measurements of age-matched *eIF4E*<sup>S209A/S209A</sup> mice compared to WT mice. **(B)** WT and *eIF4E*<sup>S209A/S209A</sup> urine BCPN levels as determined by mass spectrometry (n = 6-9 mice/genotype). n.s. = not statistically significant. Data are presented as means +/- SEM.

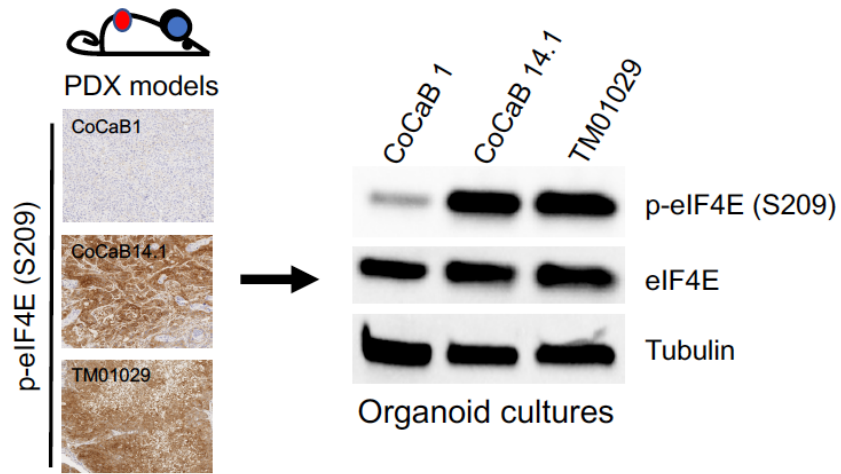

**Figure S5. Comparison of IHC and western blot analysis of PDX models.** PDX-derived primary tumor organoids reflect the phospho-eIF4E levels of the PDX models they are derived from. Comparison of eIF4E S209 phosphorylation levels between the CoCaB1, CoCaB14.1, and TM01029 PDX models and their respective organoids.

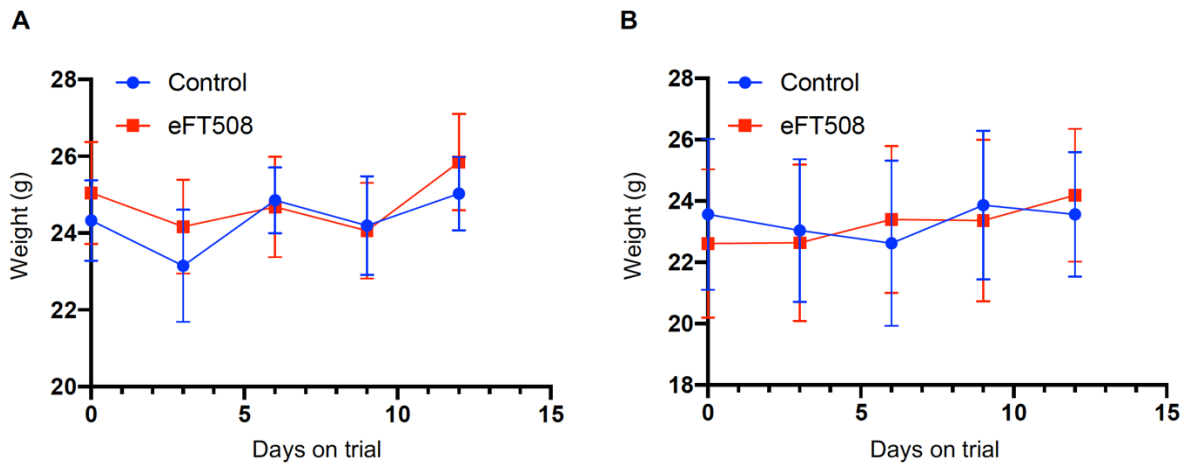

**Figure S6. eFT508 treatment is well tolerated in PDX models.** Weights of the TM01029 (A) and CoCaB1 (B) PDX models treated with eFT508 10mg/kg PO daily.

**Figure 1C**

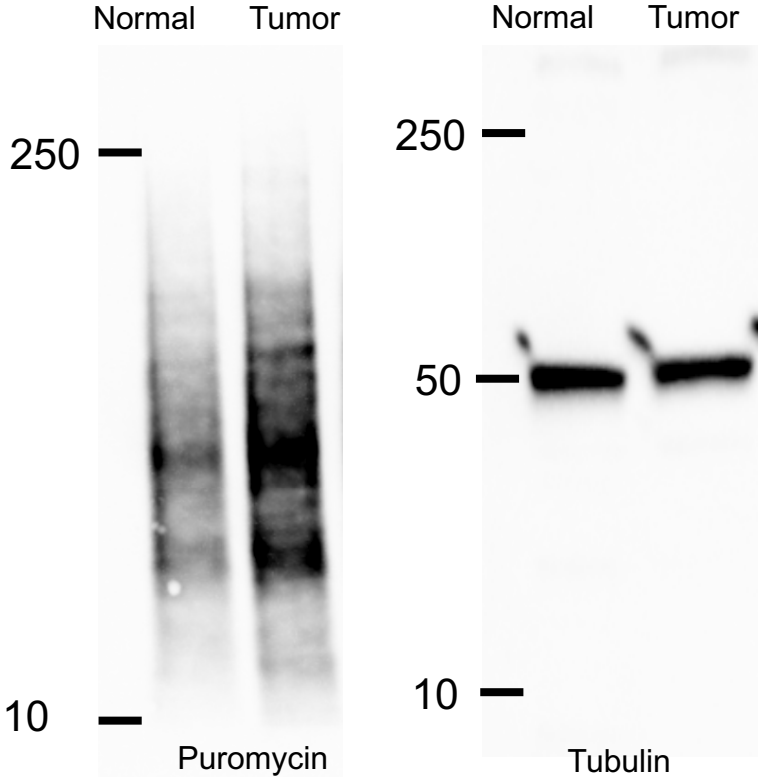

**Figure 1D**

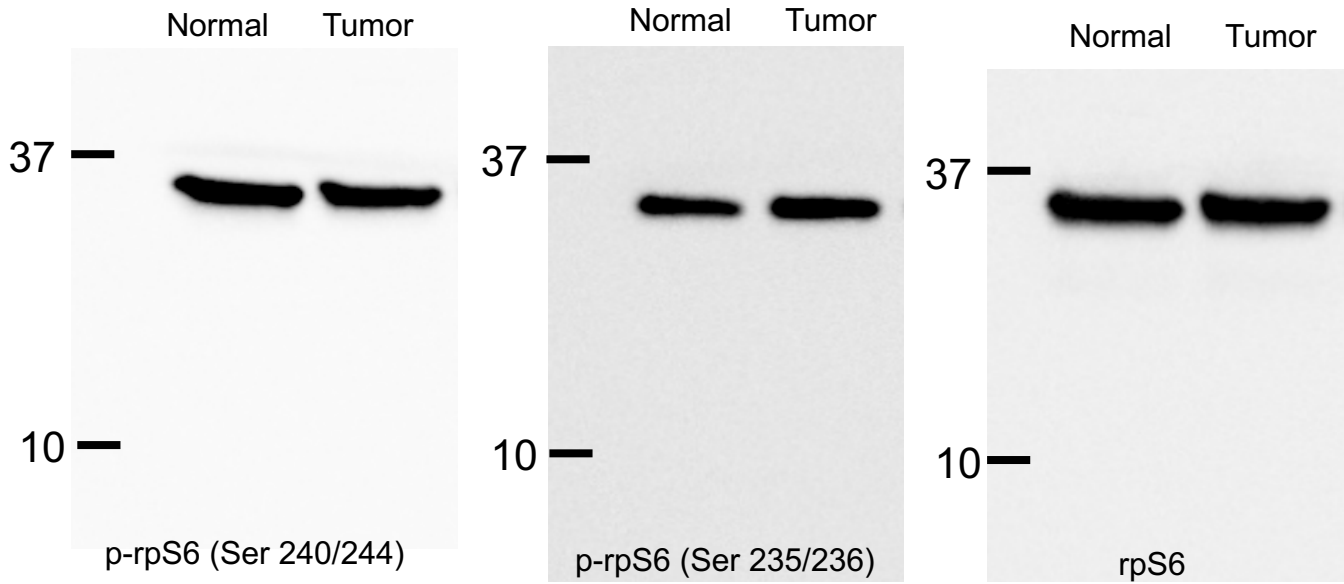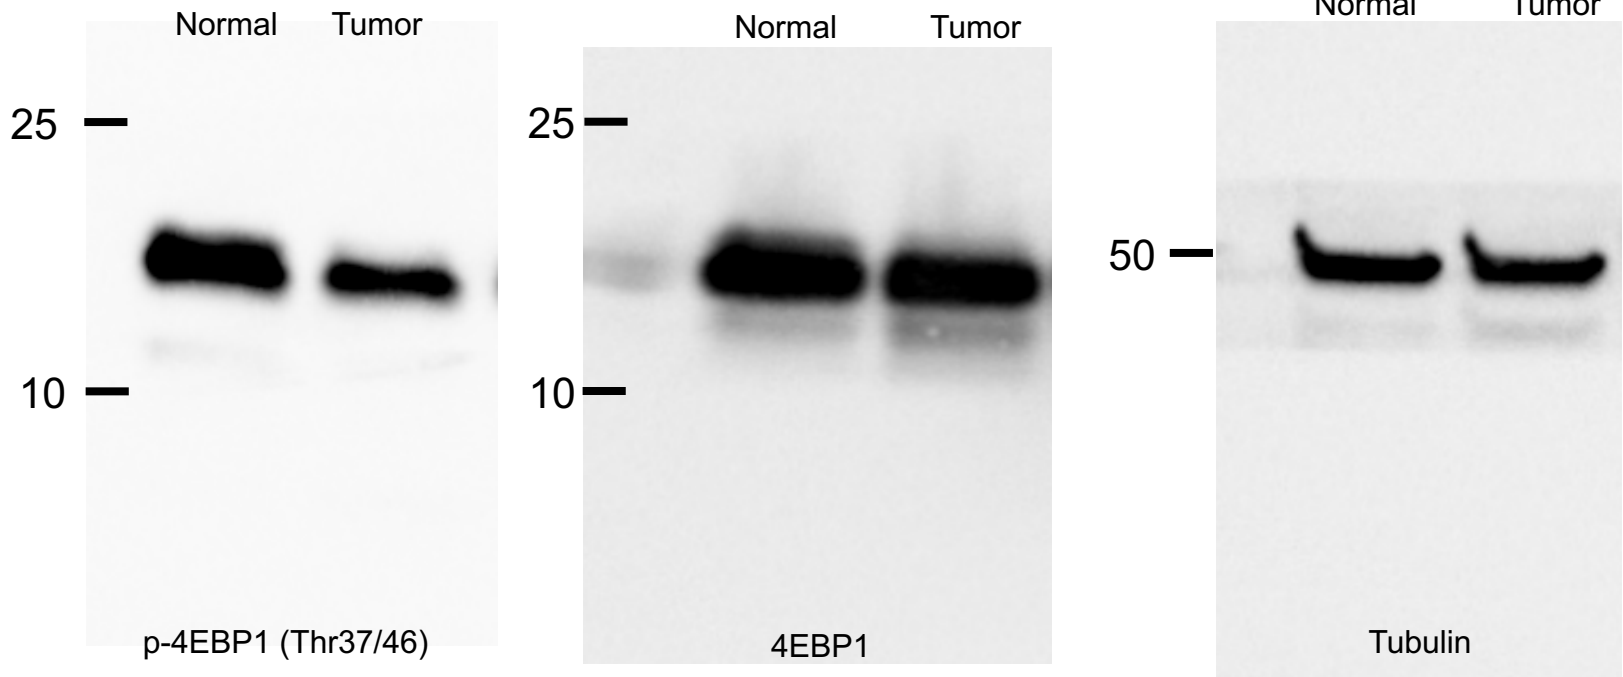

This tubulin blot was the loading control for all PI3K pathway and integrated stress response pathway blots.



**Figure 1D**

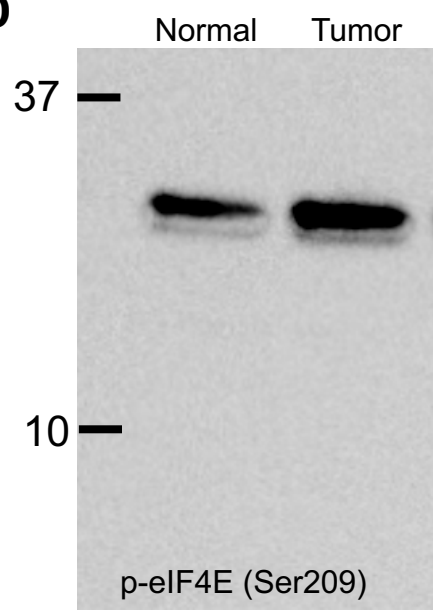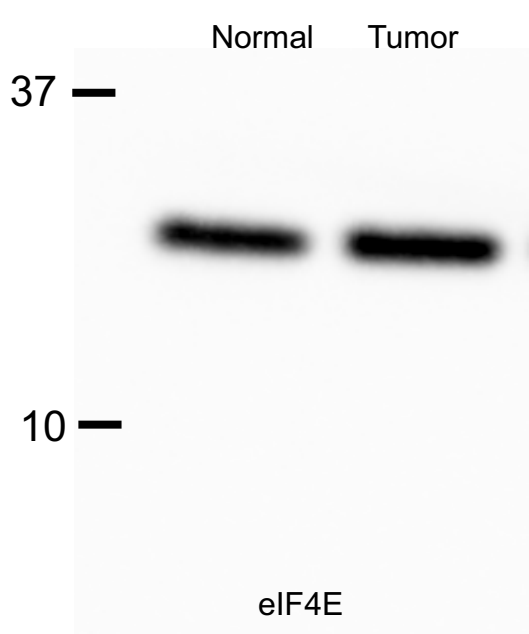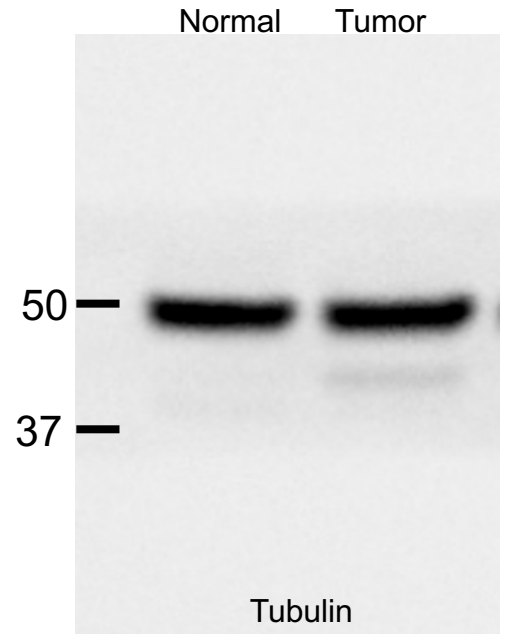

This tubulin blot was the loading control for the eIF4E and eEF2 blots

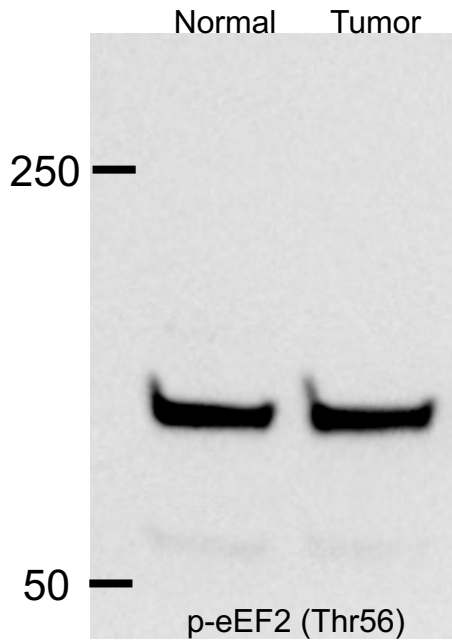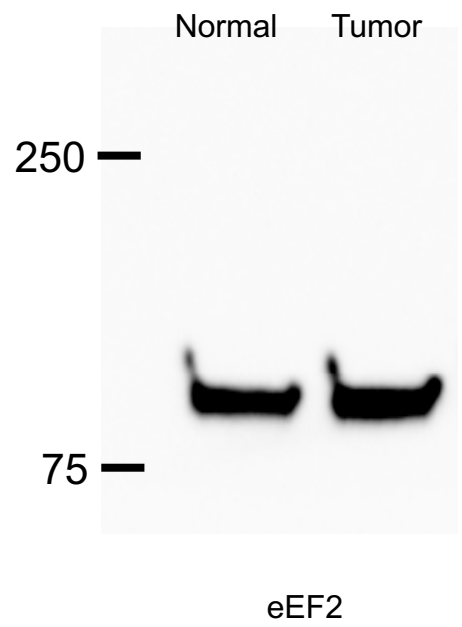

**Figure 1D**

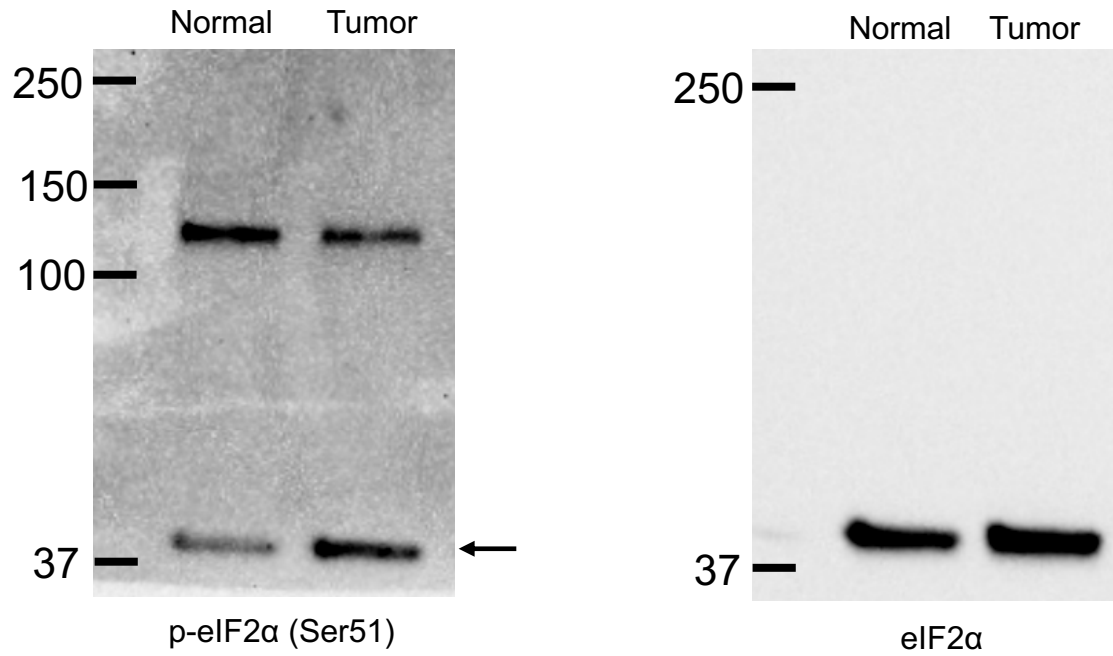

**Figure 3C**

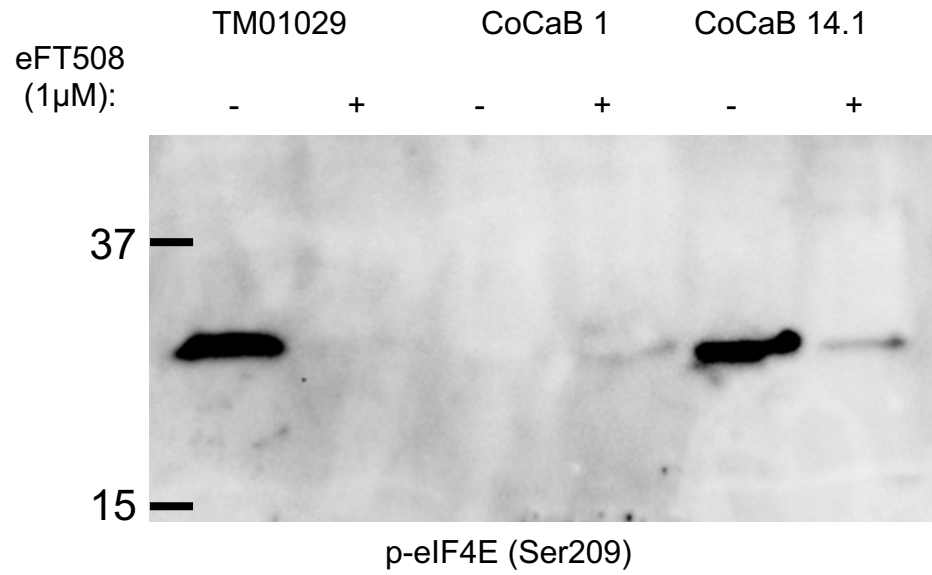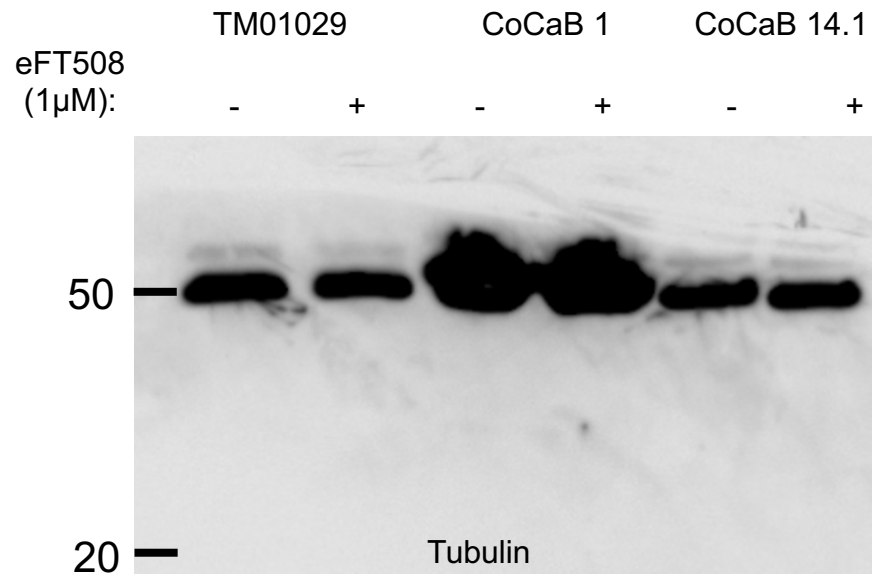

# Supplemental Figure 3C

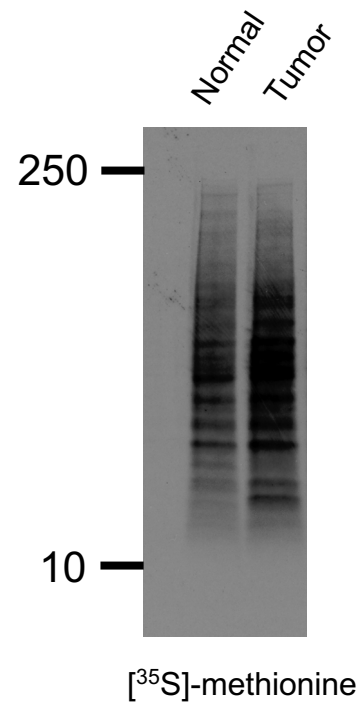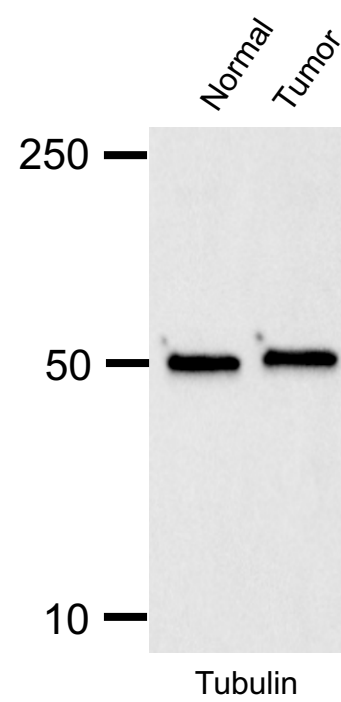

# Supplemental Figure 5

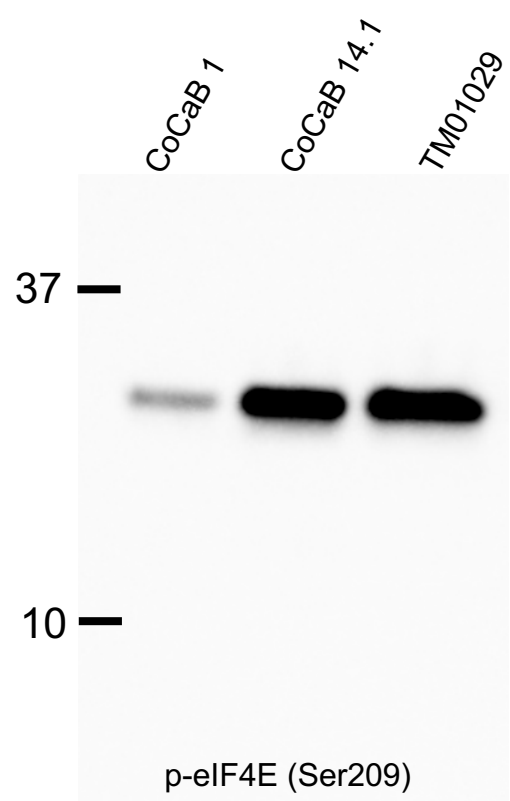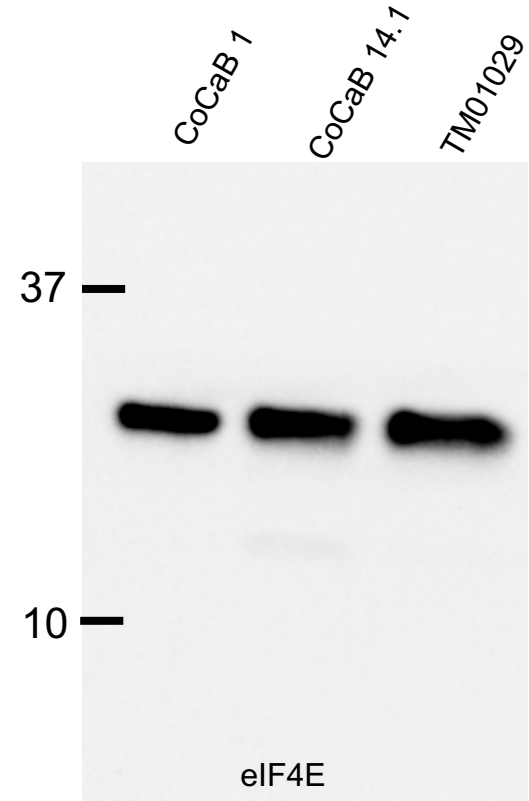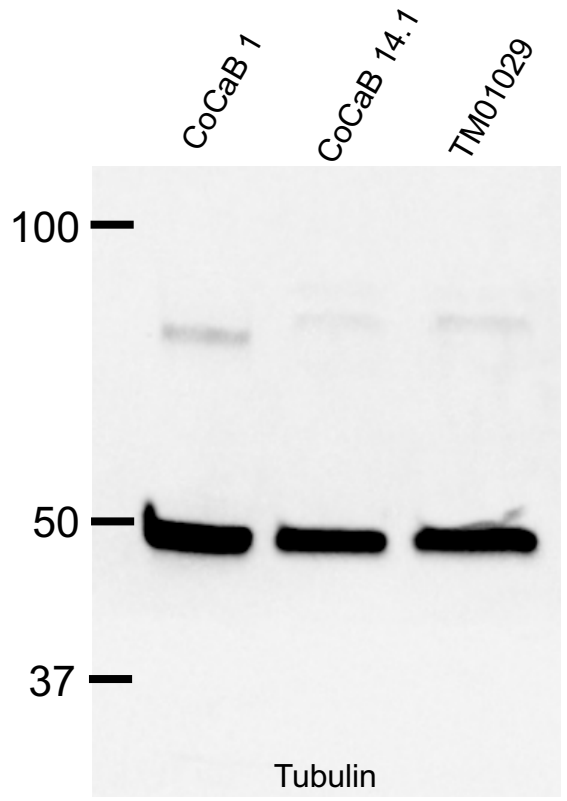

Supplement: jciinsight-6-144920-s014.pdf [file jciinsight-6-144920-s014.pdf]
